# Supplementary material
Source: publisher figshare collection journal article supplement (https://acs.figshare.com/ndownloader/files/3831349)
Supplement: Supplementary file 1 [file 3831349]

## *Supporting Information for*

# **Hybrid Lipid Capped Mesoporous Silica for Stimuli-Responsive Drug Release and Overcoming Multidrug Resistance**

*Ning Han<sup>a</sup>, Qinfu Zhao<sup>a</sup>, Long Wan<sup>a</sup>, Ying Wang<sup>a</sup>, Yikun Gao<sup>c</sup>, Pu Wang<sup>b</sup>, Zhanyou Wang<sup>b</sup>, Jinghai Zhang<sup>c</sup>, Tongying Jiang<sup>a</sup>, Siling Wang<sup>a,\*</sup>*

a Department of Pharmaceutics, School of Pharmacy, Shenyang Pharmaceutical University, 103 Wenhua Road, Shenyang, Liaoning Province 110016, PR China

b College of Life and Health Sciences, Northeastern University, Shenyang 110004, China

c School of Medical Devices, Shenyang Pharmaceutical University, Shenyang 110016, China

Corresponding author: Tel./Fax: +86 24 23986348

E-mail: [silingwang@syphu.edu.cn](mailto:silingwang@syphu.edu.cn)

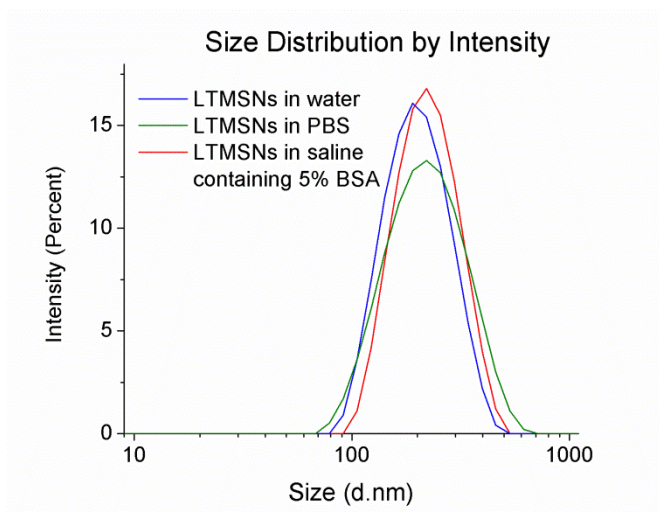

Fig.1 Size distribution of LTMSNs in water, PBS and saline containing 5% BSA.

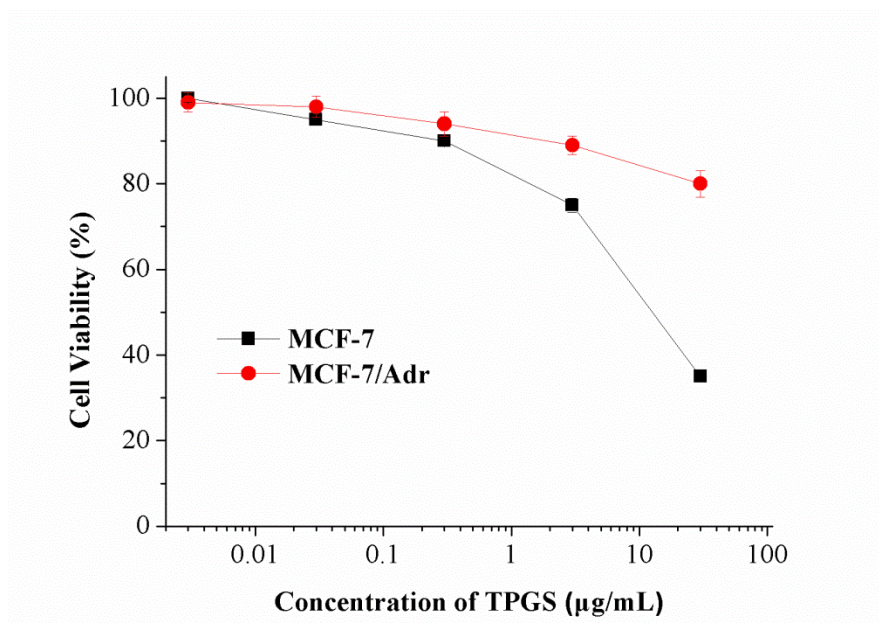

Fig.2 Cytotoxicity of the corresponding amount of TPGS in LTMSNs-DOX formulations at serial DOX concentration of 0.01, 0.1, 1, 10 and 100 µg/mL.
